# 1 **Rapid generation of neutralizing antibody responses in COVID-19 patients**

2 Mehul S. Suthar<sup>1, 2, 3\*</sup>, Matthew G. Zimmerman<sup>1, 2, 3#</sup>, Robert C. Kauffman<sup>1, 2, 4#</sup>, Grace Mantus<sup>1, 2,</sup>  
3 <sup>4#</sup>, Susanne L. Linderman<sup>2, 4</sup>, Abigail Vanderheiden<sup>1, 2, 3</sup>, Lindsay Nyhoff<sup>1, 2, 4</sup>, Carl Davis<sup>2, 4</sup>, Seyi  
4 Adekunle<sup>1, 2, 4</sup>, Maurizio Affer<sup>1, 2, 4</sup>, Melanie Sherman<sup>5</sup>, Stacian Reynolds<sup>5</sup>, Hans P. Verkerke<sup>6</sup>,  
5 David N. Alter<sup>6</sup>, Jeannette Guarner<sup>6</sup>, Janetta Bryksin<sup>6</sup>, Michael Horwath<sup>6</sup>, Connie M. Arthur<sup>6</sup>, Natia  
6 Saakadze<sup>6</sup>, Geoffrey Hughes Smith<sup>6</sup>, Srilatha Edupuganti<sup>7,8</sup>, Erin M. Scherer<sup>7,8</sup>, Kieffer  
7 Hellmeister<sup>7,8</sup>, Andrew Cheng<sup>7,8</sup>, Juliet A. Morales<sup>7,8</sup>, Andrew S. Neish<sup>6</sup>, Sean R. Stowell<sup>6</sup>, Filipp  
8 Frank<sup>9</sup>, Eric Ortlund<sup>9</sup>, Evan Anderson<sup>1</sup>, Vineet D. Menachery<sup>10</sup>, Nadine Rouphael<sup>7,8</sup>, Aneesh  
9 Mehta<sup>8</sup>, David S. Stephens<sup>8</sup>, Rafi Ahmed<sup>2, 4</sup>, John D. Roback<sup>6</sup>, Jens Wrammert<sup>1, 2, 4\*</sup>

10

11 <sup>1</sup>Department of Pediatrics, Division of Infectious Disease, Emory University School of Medicine, Atlanta, GA 30322,  
12 USA.

13 <sup>2</sup>Emory Vaccine Center, Emory University School of Medicine, Atlanta, GA 30329, USA.

14 <sup>3</sup>Yerkes National Primate Research Center, Atlanta, GA 30329, USA.

15 <sup>4</sup>Department of Microbiology and Immunology, Emory University School of Medicine, Atlanta, GA 30322, USA.

16 <sup>5</sup>Emory Medical Laboratories, Emory Healthcare, Atlanta, GA, 30322, USA

17 <sup>6</sup>Department of Pathology and Laboratory Medicine, Emory University School of Medicine, Atlanta, GA 30322, USA.

18 <sup>7</sup>Hope Clinic of the Emory Vaccine Center, , Emory University School of Medicine Decatur, Atlanta, GA, USA.

19 <sup>8</sup>Division of Infectious Diseases, Department of Medicine, Emory University School of Medicine, Atlanta, GA, USA.

20 <sup>9</sup>Department of Biochemistry, Emory University School of Medicine, Atlanta, GA, USA

21 <sup>10</sup>Department of Microbiology and Immunology, Institute for Human Infection and Immunity, World Reference Center  
22 for Emerging Viruses and Arboviruses, University of Texas Medical Branch, Galveston, TX, USA.

23 #These authors contributed equally to this work.

24 \*Correspondence: Mehul S. Suthar ([mehul.s.suthar@emory.edu](mailto:mehul.s.suthar@emory.edu)) and Jens Wrammert ([jwramme@emory.edu](mailto:jwramme@emory.edu))

25 Lead contact: Jens Wrammert ([jwramme@emory.edu](mailto:jwramme@emory.edu))

26

27

28 **SUMMARY**

29 SARS-CoV-2 is currently causing a devastating pandemic and there is a pressing need to  
30 understand the dynamics, specificity, and neutralizing potency of the humoral immune response  
31 during acute infection. Herein, we report the dynamics of antibody responses to the receptor-  
32 binding domain (RBD) of the spike protein and virus neutralization activity in 44 COVID-19  
33 patients. RBD-specific IgG responses were detectable in all patients 6 days after PCR  
34 confirmation. Using a clinical isolate of SARS-CoV-2, neutralizing antibody titers were also  
35 detectable in all patients 6 days after PCR confirmation. The magnitude of RBD-specific IgG  
36 binding titers correlated strongly with viral neutralization. In a clinical setting, the initial analysis of  
37 the dynamics of RBD-specific IgG titers was corroborated in a larger cohort of PCR-confirmed  
38 patients (n=231). These findings have important implications for our understanding of protective  
39 immunity against SARS-CoV-2, the use of immune plasma as a therapy, and the development of  
40 much-needed vaccines.

41  
42 **KEYWORDS:** COVID-19, SARS-CoV-2, Neutralizing antibody; Spike protein, Receptor-binding  
43 protein, Coronavirus, Protective immunity, Serology test, Humoral immune response

44

## 45 INTRODUCTION

46 COVID-19 is a global pandemic. There is a pressing need to understand the immunological  
47 response that mediates protective immunity to SARS-CoV-2. Antibody responses to the spike (S)  
48 protein are thought to be to the primary target of neutralizing activity during viral infection,  
49 conferring superior protective immunity compared to the membrane (M), envelope (E), and  
50 nucleocapsid proteins (Bolles et al., 2011; Buchholz et al., 2004; Deming et al., 2006). The S  
51 glycoprotein is a class I viral fusion protein that exists as a metastable prefusion homotrimer  
52 consisting of individual polypeptide chains (between 1100-1600 residues in length) responsible  
53 for cell attachment and viral fusion (Bosch et al., 2003; Hoffmann et al., 2020; Wang et al., 2020).  
54 Each of the S protein protomers is divided into two distinct regions, the S<sub>1</sub> and S<sub>2</sub> subunits (Bosch  
55 et al., 2003; Tortorici and Veessler, 2019). The S<sub>1</sub> subunit is a V-shaped polypeptide with four  
56 distinct domains, Domains A, B, C, and D, with Domain B functioning as the receptor-binding  
57 domain (RBD) for most coronaviruses, including the pathogenic  $\beta$ -coronaviruses such as SARS-  
58 CoV-2, SARS and MERS (Fig. 1A; Supplementary Fig. 1A) (Li et al., 2005; Lu et al., 2013;  
59 Tortorici and Veessler, 2019; Walls et al., 2020). Recent studies have shown that the SARS-CoV-  
60 2 RBD interacts with the ACE2 receptor for cellular attachment (Hoffmann et al., 2020; Walls et  
61 al., 2020; Wang et al., 2020). Sequence analysis of the RBD shows extensive homology in this  
62 region to SARS (73%). In contrast, MERS and other seasonal coronaviruses show minimal  
63 sequence homology to the SARS-CoV-2 RBD (7-18%) (Fig. 1B). Herein, we set out to understand  
64 the dynamics, specificity, and neutralizing potency of the humoral immune response against the  
65 RBD of the SARS-CoV-2 spike protein during acute infection.

66

### 67 **The magnitude of RBD-specific antibody responses in acutely infected COVID-19 patients**

68 To determine the magnitude of antibody responses, Ig isotype, and IgG subclass usage against  
69 the RBD of the SARS-CoV-2 spike protein, we analyzed a cohort of acutely infected COVID-19

70 patients (n=44) enrolled at two hospitals in the Emory Healthcare System in Atlanta (Emory  
71 University Hospital and Emory University Hospital Midtown). These patients were recruited from  
72 both the inpatient ward and the ICU (patient details are provided in Table 1). These samples  
73 represent a cross-section of days after patient-reported symptom onset (3-30 days) and PCR  
74 confirmation (2-19 days). As healthy controls, we used plasma samples collected at baseline in a  
75 vaccine study performed in early 2019 (n=12). The RBD protein was cloned and expressed in  
76 mammalian cells (Supplementary Fig. 1B) and was validated by ELISA using CR3022, a SARS-  
77 specific human monoclonal antibody that cross-reacts with SARS-CoV-2 (ter Meulen et al., 2006)  
78 (Supplementary Fig. 1C). Size exclusion chromatography shows that the recombinant RBD  
79 protein is homogenous and does not form aggregates (Supplementary Fig. 1D). We found that a  
80 majority of COVID-19 patients (36 out of 44) developed RBD-specific class-switched IgG  
81 responses (Fig. 1C) (mean titer: 18500, range: <100-142765). These patients also showed IgM  
82 and IgA responses of lower magnitude as compared to IgG (IgM mean titer: 3731, range: <100-  
83 40197 and IgA mean titer: 973, range: <100-19918). All of the negative controls were below the  
84 limit of detection in the endpoint analysis for binding to the RBD antigen (Fig. 1C, red). A  
85 representative RBD-specific IgG ELISA assay for a subset of these donors is shown in Figure 1D  
86 to illustrate the dynamic range of these measurements. A number of the COVID-19 patient  
87 samples that scored either negative or low in the RBD IgG ELISA had higher titers of IgM (Fig.  
88 1E, green). Finally, IgG subclass analysis showed that the COVID-19 patients exclusively made  
89 RBD-specific IgG1 and IgG3, with no detectable IgG2 or IgG4. Taken together, these findings  
90 illustrate that antibody class-switching to IgG occurs early during acute infection.

91

## 92 **Neutralization potency of antibody responses in COVID-19 patients**

93 We next determined the neutralization capacity of samples from the cohort of acutely infected  
94 COVID-19 patients. We have developed a focus reduction neutralization titer (FRNT) assay for

95 SARS-CoV-2. In this assay, COVID-19 patient plasma is incubated with a clinical isolate of SARS-  
96 CoV-2 followed by infection of VeroE6 cells (Harcourt et al., 2020). The neutralization potency of  
97 the plasma sample is measured by the reduction in virally-infected foci. We screened plasma from  
98 COVID-19 patients (n=44) and found that a majority of the samples (40/44) showed neutralization  
99 capacity, with titers ranging from 1:5763 to 1:55 (Fig. 2A). A representative example of viral  
100 neutralization is shown in Figure 2b where pre-incubation with control plasma yields about 250  
101 foci whereas the COVID-19 patient sample completely inhibited the formation of infected foci (Fig.  
102 2B). Representative neutralization curves for a subset of samples are shown to illustrate the  
103 dynamic range of the results obtained (Fig. 2C). A plaque reduction neutralization titer (PRNT)  
104 assay is the classic method for determining the neutralization capacity of a plasma sample against  
105 coronavirus infection (Rockx et al., 2008). To confirm the efficiency of these two assays, we  
106 compared the neutralization titers between a standard PRNT assay and an FRNT assay for a  
107 subset of the patient samples (n=9). Overall, we observed a strong positive correlation between  
108 these two assays (Fig. 2D), demonstrating the robustness of the FRNT assay Overall, these  
109 findings demonstrate that neutralizing antibody responses are generated early during acute  
110 COVID-19 infection.

111

### 112 **Kinetics of the antibody responses during acute SARS-CoV-2 infection**

113 The patient samples were collected across a range of days after symptom onset or PCR  
114 confirmation of SARS-CoV-2 infection (Table 1). To understand the relationship between these  
115 variables and RBD-specific IgG antibody titers and viral neutralization potency, we performed  
116 correlation analyses. In all cases, we observed significant correlations between the number of  
117 days elapsed after symptom onset or positive PCR test and the RBD-specific IgG titer or viral  
118 neutralization titer (Fig. 3). Several key points regarding the kinetics of antibody responses can  
119 be made from this correlation analysis. Antibody responses against the RBD (Fig. 3A), as well as

120 SARS-CoV-2 virus neutralization titers (Fig. 3B), can be detected in a majority of patients around  
121 day 8 after symptom onset. When the number of days after PCR confirmation is used to assess  
122 the duration of infection, both RBD-binding titers (Fig. 3C) and viral neutralization titers (Fig. 3D)  
123 can be detected in many patients already between days 2-6. Beyond 6 days post-PCR  
124 confirmation, all patients display both antibody binding and neutralization titers. Taken together,  
125 these findings illustrate that both RBD-specific and neutralizing antibody responses occur rapidly  
126 after SARS-CoV-2 infection.

127

### 128 **RBD-specific antibody titers as a surrogate of neutralization potency in acutely infected** 129 **COVID-19 patients**

130 We observed a wide range of RBD-specific and neutralizing antibody responses across the cohort  
131 of acutely infected COVID-19 patients. We found that the magnitude of RBD-specific IgG titers  
132 positively correlated with neutralization titers ( $r^2= 0.7$ ;  $p<0.0001$ ; Fig. 4A). Overall, we observed  
133 viral neutralization activity in 40 out of 44 samples from acutely infected COVID-19 patients.

134

135 We next validated the RBD-specific IgG ELISA for high-throughput testing at the Emory Medical  
136 Laboratories. For these analyses, we collected serum from 231 PCR-confirmed COVID-19 patient  
137 samples within the first 22 days after PCR confirmation (Supplementary Table 1). In addition, 40  
138 samples collected in 2019 were used as negative controls. These samples were grouped from 0-  
139 3 days, 4-6 days, and 7 or more days after PCR confirmation and analyzed using a high-  
140 throughput clinical RBD ELISA. The cumulative results of these efforts are shown as receiver  
141 operating characteristic (ROC) curves (Fig. 4B). This assay is almost perfectly discriminatory on  
142 day 7 or later after PCR confirmation, with an area under the curve (AUC) of 1.00 (n=83). When  
143 utilized earlier in the disease course, the performance of this diagnostic assay is reduced. When

144 the RBD specific IgG ELISA were analyzed for the samples collected closer to the time of  
145 infection, the AUC for the day 4-6 group (n=76) and the day 0-3 group (n=72) fell to 0.93 and  
146 0.80, respectively. Using an OD cut-off of 0.175 resulted in calculated sensitivity and specificity  
147 values of 97.5% and 98%, respectively. Taken together, these findings demonstrate that RBD-  
148 specific IgG titers could be used as a surrogate of neutralization activity against SARS-CoV-2  
149 infection and that the RBD assay is highly specific and sensitive. Further, this demonstrates the  
150 necessity of appropriate timing of sample collection when using serologic diagnostic tests of  
151 acutely infected COVID-19 patients (Lee et al., 2020; Okba et al., 2020).

152

153 **DISCUSSION**

154 In this study, we show that RBD-specific IgG antibody responses are rapidly induced during  
155 severe and moderate acute COVID-19 infection, with most patients showing RBD-specific  
156 antibody responses by 6 days post-PCR confirmation. Consistently, we found that class-switching  
157 also occurs early during infection and is dominated by RBD-specific IgG1 and IgG3 responses.  
158 We also detected both RBD-specific IgM and IgA responses at relatively lower levels as compared  
159 to IgG. These responses result in neutralizing antibody responses that directly correlated with  
160 RBD-specific IgG antibody titers. These findings strongly indicate that a robust humoral immune  
161 response occurs early during severe or moderate COVID-19 infections.

162

163 The validation of the sensitive and selective RBD based clinical assay at EML and the correlation  
164 with viral neutralization is promising for both diagnostic purposes and ongoing seroprevalence  
165 studies of healthcare workers and the general population. These serology tests could be used for  
166 making informed decisions for convalescent plasma therapy that are currently undergoing clinical  
167 testing as a possible therapeutic or even prophylactic option (Bloch et al., 2020; Shen et al., 2020).  
168 Further, the kinetic findings presented herein are essential for ongoing efforts aimed at applying  
169 antibody testing for clinical diagnostic purposes, highlighting the importance of appropriate timing  
170 of these tests relative to PCR testing and/or symptom onset after infection. A comprehensive  
171 understanding of the dynamics of antibody responses after infection will also be key for  
172 understanding disease pathogenesis, risk assessment in vulnerable populations, evaluation of  
173 novel therapeutics, and development of vaccines.

174

175 The appearance of high titer neutralizing antibody responses early after the infection is promising  
176 and may offer some degree of protection from re-infection. Future studies will need to define the



177 neutralizing titer which constitutes a robust correlate of protective immunity and determine the  
178 durability of these responses over time (Liu et al., 2006). This information will be essential for  
179 ongoing vaccine development efforts (Amanat and Krammer, 2020).

180

181 **Acknowledgments:** We would like to thank Laurel Bristow, Ariel Kay, Youssef Saklawi, Ghina  
182 Alaaeddine, Nina McNair, Ellie Butler, Brandi Johnson, Christopher Huerta, Jennifer Kleinhenz,  
183 Vinit Karmali, Yong Xu, Dongli Wang, Michele McCullough for sample processing at the Hope  
184 Clinic. We also acknowledge the dedicated efforts of Hassan Bilal, DeAndre Brown, Davette  
185 Campbell, Lisa Cole, Ginger Crews, Shanessa Fakour, Natalie Hicks, Mark Meyers, and  
186 Katherine Normile for sample collection, processing, and organization. We thank Gabrielle  
187 Holenstein, Corin Jones, Alethea Luo-Gardner, Hoa Nguyen, Keyanna Seville, and Corazon  
188 Tomblin for the exceptional technical performance of the ELISA in EML. We also acknowledge  
189 thorough and rapid chart reviews by Kari Broder. Finally, we thank all the participating patients,  
190 and the hospital staff caring for them.

191  
192 **Funding:** This work was funded in part by an Emory EVPHA Synergy Fund award (M.S.S and  
193 J.W), and by the National Institutes of Health NIAID Infectious Diseases Clinical Research  
194 Consortium (IDCRC) UM1 AI148684 (D.S.S, R.A and J.W), R01 AI137127 (J.W), ORIP/OD  
195 P51OD011132 (M.S.S), R00 AG049092 (V.D.M) and World Reference Center for Emerging  
196 Viruses and Arboviruses R24 AI120942 (V.D.M), and HIPC 5U19AI090023-10 (N.R, E.A and A.M)  
197 and VTEU 1UM1AI148576-01 (E.A and N.R). The funders had no role in study design, data  
198 collection and analysis, decision to publish, or preparation of the manuscript.

199  
200 **Author contributions:**  
201 M.S, S.R, H.P.V, D.N.A, J.G, G.M, S.L, A.V contributed to the acquisition, analysis, and  
202 interpretation of the data, J. B and M.C.H contributed to the acquisition and interpretation of the  
203 data, C.M.A and N.S. contributed to the acquisition of the data, G.H.S, M.G.Z, R.C.K contributed  
204 to the acquisition, analysis, and interpretation of the data, and helped draft the work, A.M, A.S.N  
205 and S.R.S contributed to the acquisition, analysis, and interpretation of the data, as well as the  
206 conception and design of the work, D.S.S, L.N, S.A, M.A, and V.D.M contributed to the analysis,

207 and interpretation of the data, S.E served as the principal investigator of the clinical protocol for  
208 acquisition of patient samples and contributed to the interpretation of data, E.S, K.H, A.C, J.A.M,  
209 N.R, and E.A contributed to the acquisition and interpretation of the data, J.D.R, R.A, J.W, and  
210 M.S.S contributed to the acquisition, analysis, and interpretation of the data, as well as the  
211 conception and design of the work, and writing the manuscript.

212

213 **Declaration of interests:** The authors declare no competing interests.

214

## 215 **References**

- 216 Amanat, F., and Krammer, F. (2020). SARS-CoV-2 Vaccines: Status Report. *Immunity* 52, 583-  
217 589.
- 218 Bloch, E.M., Shoham, S., Casadevall, A., Sachais, B.S., Shaz, B., Winters, J.L., van Buskirk, C.,  
219 Grossman, B.J., Joyner, M., Henderson, J.P., *et al.* (2020). Deployment of convalescent plasma  
220 for the prevention and treatment of COVID-19. *J Clin Invest.*
- 221 Bolles, M., Donaldson, E., and Baric, R. (2011). SARS-CoV and emergent coronaviruses: viral  
222 determinants of interspecies transmission. *Curr Opin Virol* 1, 624-634.
- 223 Bosch, B.J., van der Zee, R., de Haan, C.A., and Rottier, P.J. (2003). The coronavirus spike  
224 protein is a class I virus fusion protein: structural and functional characterization of the fusion  
225 core complex. *J Virol* 77, 8801-8811.
- 226 Buchholz, U.J., Bukreyev, A., Yang, L., Lamirande, E.W., Murphy, B.R., Subbarao, K., and  
227 Collins, P.L. (2004). Contributions of the structural proteins of severe acute respiratory  
228 syndrome coronavirus to protective immunity. *Proc Natl Acad Sci U S A* 101, 9804-9809.
- 229 Deming, D., Sheahan, T., Heise, M., Yount, B., Davis, N., Sims, A., Suthar, M., Harkema, J.,  
230 Whitmore, A., Pickles, R., *et al.* (2006). Vaccine efficacy in senescent mice challenged with  
231 recombinant SARS-CoV bearing epidemic and zoonotic spike variants. *PLoS Med* 3, e525.
- 232 Harcourt, J., Tamin, A., Lu, X., Kamili, S., Sakthivel, S.K., Murray, J., Queen, K., Tao, Y.,  
233 Paden, C.R., Zhang, J., *et al.* (2020). Severe Acute Respiratory Syndrome Coronavirus 2 from  
234 Patient with 2019 Novel Coronavirus Disease, United States. *Emerg Infect Dis* 26.
- 235 Hoffmann, M., Kleine-Weber, H., Schroeder, S., Kruger, N., Herrler, T., Erichsen, S.,  
236 Schiergens, T.S., Herrler, G., Wu, N.H., Nitsche, A., *et al.* (2020). SARS-CoV-2 Cell Entry  
237 Depends on ACE2 and TMPRSS2 and Is Blocked by a Clinically Proven Protease Inhibitor. *Cell*  
238 181, 271-280 e278.
- 239 Lee, Y.L., Liao, C.H., Liu, P.Y., Cheng, C.Y., Chung, M.Y., Liu, C.E., Chang, S.Y., and Hsueh,  
240 P.R. (2020). Dynamics of anti-SARS-Cov-2 IgM and IgG antibodies among COVID-19 patients.  
241 *J Infect.*
- 242 Li, F., Li, W., Farzan, M., and Harrison, S.C. (2005). Structure of SARS coronavirus spike  
243 receptor-binding domain complexed with receptor. *Science* 309, 1864-1868.
- 244 Liu, W., Fontanet, A., Zhang, P.H., Zhan, L., Xin, Z.T., Baril, L., Tang, F., Lv, H., and Cao, W.C.  
245 (2006). Two-year prospective study of the humoral immune response of patients with severe  
246 acute respiratory syndrome. *J Infect Dis* 193, 792-795.

- 247 Lu, G., Hu, Y., Wang, Q., Qi, J., Gao, F., Li, Y., Zhang, Y., Zhang, W., Yuan, Y., Bao, J., *et al.*  
248 (2013). Molecular basis of binding between novel human coronavirus MERS-CoV and its  
249 receptor CD26. *Nature* 500, 227-231.
- 250 Okba, N.M.A., Muller, M.A., Li, W., Wang, C., GeurtsvanKessel, C.H., Corman, V.M., Lamers,  
251 M.M., Sikkema, R.S., de Bruin, E., Chandler, F.D., *et al.* (2020). Severe Acute Respiratory  
252 Syndrome Coronavirus 2-Specific Antibody Responses in Coronavirus Disease 2019 Patients.  
253 *Emerg Infect Dis* 26.
- 254 Rockx, B., Corti, D., Donaldson, E., Sheahan, T., Stadler, K., Lanzavecchia, A., and Baric, R.  
255 (2008). Structural basis for potent cross-neutralizing human monoclonal antibody protection  
256 against lethal human and zoonotic severe acute respiratory syndrome coronavirus challenge. *J*  
257 *Virology* 82, 3220-3235.
- 258 Shen, C., Wang, Z., Zhao, F., Yang, Y., Li, J., Yuan, J., Wang, F., Li, D., Yang, M., Xing, L., *et*  
259 *al.* (2020). Treatment of 5 Critically Ill Patients With COVID-19 With Convalescent Plasma.  
260 *JAMA*.
- 261 ter Meulen, J., van den Brink, E.N., Poon, L.L., Marissen, W.E., Leung, C.S., Cox, F., Cheung,  
262 C.Y., Bakker, A.Q., Bogaards, J.A., van Deventer, E., *et al.* (2006). Human monoclonal antibody  
263 combination against SARS coronavirus: synergy and coverage of escape mutants. *PLoS Med* 3,  
264 e237.
- 265 Tortorici, M.A., and Veesler, D. (2019). Structural insights into coronavirus entry. *Adv Virus Res*  
266 105, 93-116.
- 267 Walls, A.C., Park, Y.J., Tortorici, M.A., Wall, A., McGuire, A.T., and Veesler, D. (2020).  
268 Structure, Function, and Antigenicity of the SARS-CoV-2 Spike Glycoprotein. *Cell* 181, 281-292  
269 e286.
- 270 Wang, Q., Zhang, Y., Wu, L., Niu, S., Song, C., Zhang, Z., Lu, G., Qiao, C., Hu, Y., Yuen, K.Y.,  
271 *et al.* (2020). Structural and Functional Basis of SARS-CoV-2 Entry by Using Human ACE2.  
272 *Cell*.
- 273 Wrapp, D., Wang, N., Corbett, K.S., Goldsmith, J.A., Hsieh, C.L., Abiona, O., Graham, B.S., and  
274 McLellan, J.S. (2020). Cryo-EM structure of the 2019-nCoV spike in the prefusion conformation.  
275 *Science* 367, 1260-1263.
- 276

277 **FIGURE LEGENDS**

278 **Table 1. COVID-19 patient cohort**

279 **Figure 1. Antibody responses against SARS-CoV-2 RBD in PCR-confirmed acutely infected**  
280 **COVID-19 patients.** A) Structure of a SARS-CoV-2 spike protein (single monomer is shown) with  
281 the RBD highlighted in red(Wang et al., 2020) B) Sequence homology analysis of SARS-CoV-2  
282 spike protein RBD compared to SARS, MERS, and seasonal alpha- and beta-CoVs. C) ELISA  
283 endpoint titers for SARS-CoV-2 RBD specific IgG, IgA and IgM in PCR confirmed acute COVID-  
284 19 patients (n=44) and healthy controls collected in early 2019. Endpoint cutoff values were  
285 calculated using the mean of the 12 healthy controls at 1/100 dilution, times 3 standard deviations  
286 (shown as a dotted line). D) Representative ELISA assays for 10 patients and 12 healthy controls.  
287 E) Direct comparison of IgM and IgG for individual donors. A number of the IgG negative or low  
288 early samples were IgM positive (shown in green). F) Endpoint titer analysis of IgG subclass  
289 distribution. Each experiment was performed at least twice and a representative data set is  
290 shown.

291  
292 **Figure 2. COVID-19 patient plasma neutralizes SARS-CoV-2.** A) Neutralization activity of  
293 serum samples against SARS-CoV-2. The FRNT<sub>50</sub> titers of COVID-19 patients (n=44) and healthy  
294 controls (n=10) sera were determined by a novel FRNT assay using an immunostain to detect  
295 infected foci. Each circle represents one serum sample. The dotted line represents the maximum  
296 concentrations of the serum tested (1/50). B) Representative sample showing a reduction in foci  
297 from a neutralization assay with sera from an infected COVID-19 patient. C) Representative  
298 FRNT<sub>50</sub> curves (n=22). The dotted line represents 50% neutralization. D) Comparison of PRNT<sub>50</sub>  
299 against FRNT<sub>50</sub> titers (n=9). Each experiment was performed at least twice and a representative  
300 data set is shown.

301

302 **Figure 3. SARS-CoV-2 antibody responses correlate with the progression of acute SARS-**  
303 **CoV-2 infection.** Comparison of RBD-specific IgG titers and neutralization titers with (A-B) days  
304 after symptom onset or (C-D) days after PCR positive confirmation for each patient. Correlation  
305 analysis was performed by log transformation of the endpoint ELISA titers followed by linear  
306 regression analysis.

307

308 **Figure 4. RBD-specific antibody titers as a surrogate of neutralization potency in acutely**  
309 **infected COVID-19 patients.** A) Comparison of RBD-specific IgG endpoint titers with SARS-  
310 CoV-2-specific FRNT<sub>50</sub> titers. Correlation analysis was performed by log transformation of the  
311 endpoint ELISA or FRNT<sub>50</sub> titers followed by linear regression analysis. B) The RBD-specific  
312 ELISA was validated for high-throughput clinical testing in Emory Medical Laboratories. Sera  
313 (n=231) were collected from COVID-19 patients within the first 22 days after PCR-confirmation  
314 (Supplementary Table 1). Sera (n=40) collected in 2019 were used as negative controls. ROC  
315 curves are shown comparing the true positive and false negative rates of the ELISA using different  
316 OD cutoffs and sera collected at different times post-infection. Whereas the RBD ELISA produced  
317 an area under the curve (AUC) of 0.80 when samples were collected close to the time of infection  
318 (within 3 days of positive PCR; n=76), longer sampling times resulted in better performance.  
319 Assay performance was nearly perfectly discriminatory (AUC = 1.00) when samples were  
320 collected at least 7 days after the positive PCR (n=83).

321

322

323

324 **STAR Methods**

325 **CONTACT FOR REAGENT AND RESOURCE SHARING**

326 Further information and requests for resources and reagents should be directed to and will be  
327 fulfilled by the corresponding authors Mehul Suthar (msuthar@emory.edu) and Jens Wrammert  
328 (jwramme@emory.edu).

329

330 **EXPERIMENTAL MODEL AND SUBJECT DETAILS**

331 **Ethics statement.** The serum and plasma samples used for this study were collected at Emory  
332 University Hospital and Emory University Hospital Midtown in Atlanta. All patients were diagnosed  
333 with acute SARS-CoV-2 infection by PCR, and samples were collected at a range of times post-  
334 PCR-confirmation. All collection, processing, and archiving of human specimens was performed  
335 under approval from the University Institutional Review Board (IRB #00000510 and #00022371).  
336 For IRB #00000510, informed consent was obtained prior to patient participation. For #00022371,  
337 an IRB waiver was obtained allowing the use of discarded samples in the clinical laboratory at the  
338 Emory Hospital.

339

340 **Virus and cells.** SARS-CoV-2 (2019-nCoV/USA\_WA1/2020) was isolated from the first reported  
341 case in the US (Harcourt et al., 2020). A plaque purified passage 4 stock was kindly provided by  
342 Natalie Thornburg (CDC, Atlanta, GA). Viral titers were determined by plaque assay on Vero cells  
343 (ATCC). Vero cells were cultured in complete DMEM medium consisting of 1x DMEM (Corning  
344 Cellgro), 10% FBS, 25mM HEPES Buffer (Corning Cellgro), 2mM L-glutamine, 1mM sodium  
345 pyruvate, 1x Non-essential Amino Acids, and 1x antibiotics.

346



347 **Cloning, expression, and purification of SARS-CoV-2 RDB.** A recombinant form of the spike  
348 glycoprotein receptor-binding domain (RBD) from SARS-CoV-2, Wuhan-Hu-1 (GenPept:  
349 QHD43416) was cloned for mammalian expression in human embryonic kidney expi293F cells.  
350 The receptor-binding domain consisting of amino acids 319 (arginine) to 541 (phenylalanine) of  
351 the SARS-Cov-2 S gene was amplified by PCR using a mammalian codon-optimized sequence  
352 as the DNA template (Genscript MC\_0101081). PCR amplification appended the first 12 amino  
353 acids of the native S gene signal peptide sequence to the N-terminal end of the protein and, at  
354 the C-terminal end a 6X polyhistidine tag preceded by a short linker sequence (GGGGS).  
355 Forward and Reverse primer sequences consisted were:  
356 5'-AGAGAATTCACCATGTTTCGTCTTCCTGGTCCTGCTGCCTCTGGTCTCCAGGGTGCAGC  
357 CACCGAGTCTATC-3'  
358 and 5'-CTCTAAGCTTCTATCATTAGTGGTGGTGGTGGTGGTGGCTTCCGCCTCCGCCGAA  
359 GTTCACGCACTTGTTCCTTAC-3'. 25 uL PCR reaction conditions were: 1X Phusion HF Buffer,  
360 0.2 mM dNTP, 0.63 units Phusion DNA polymerase, and 500 nM of each primer. PCR cycling  
361 conditions were: initial denaturation at 98°C, 1 minute; then 25 cycles of: 98°C, 20 seconds, 65°C  
362 30 seconds, 72°C 30 seconds; followed a final extension at 72°C for 5 minutes. Following  
363 amplification, purified PCR products (QIAquick PCR Purification, Qiagen) were digested with  
364 EcoRI-HF (NEB) and HindIII (NEB) and cloned into the EcoRI-HindIII cloning site of a mammalian  
365 expression vector containing a CMV promoter (Genbank Reference ID FJ475055). Plasmid DNA  
366 was prepared using the Qiagen PlasmidPlus Midi purification system and constructs were  
367 sequence verified. Recombinant protein expression was performed in Expi293F cells according  
368 to the manufacturer's instructions (Thermo Fisher Scientific). Briefly, expression plasmid DNA  
369 was complexed with the expifectamine lipid-based transfection reagent. Complexes were added  
370 to the cell suspensions shaking at 125 RPM and incubated overnight at 37°C in an 8% CO<sub>2</sub>  
371 humidified incubator. After 20 hours, protein expression supplements and antibiotics were added.  
372 Cultures were then incubated for an additional three days to allow for expression into the

373 supernatant. Cell culture supernatants were harvested by centrifugation at 16,000xg for 10  
374 minutes. Supernatants were sterile filtered through a 0.2  $\mu$ m filter and stored at 4°C for <7 days  
375 before purification. Analytical SDS-PAGE was performed on supernatants and the protein  
376 concentration in solution was determined by densitometry relative to the purified protein.  
377 Recombinant RBD protein levels were between 100 mg and 150 mg per liter. Purification was  
378 performed according to manufacturer's instructions using 5 mL HisTALON Superflow Cartridges  
379 (Clontech Laboratories). Briefly, an additional 11.7 g/L of sodium chloride and 0.71 g/L of cobalt(II)  
380 chloride hexahydrate were added to culture supernatants, which were adjusted to pH 7.5. The  
381 supernatant was then loaded on to the column equilibrated with 10 column volumes of 50 mM  
382 phosphate 300 mM sodium chloride buffer pH 7.5 (equilibration buffer). The column was washed  
383 with 8 column volumes of equilibration buffer supplemented with 10 mM imidazole. Protein was  
384 eluted with 6 column volumes of equilibration buffer supplemented with 150 mM imidazole. The  
385 eluted protein was dialyzed overnight against 80 volumes of phosphate-buffered saline pH 7.2.  
386 The protein was filter-sterilized (0.2  $\mu$ m) and normalized to 1 mg/mL by UV spectrophotometry  
387 using an absorption coefficient of 1.3 AU at 280 nm=1 mg/mL. Proteins were aliquoted and stored  
388 at -80°C prior to use. SDS-PAGE analysis of purified recombinant protein stained with coomassie  
389 blue demonstrated that samples were >90% pure (Fig. 1). The RBD resolves at an apparent  
390 molecular weight of 30 kDa (Fig. 1D) which is slightly larger than the theoretical molecular weight  
391 of 26.5 kDa, presumably caused by glycosylation.

392  
393 **Preparation of CR3022 monoclonal antibody and biotinylation.** The SARS-CoV S  
394 glycoprotein specific antibody CR3022 was generated recombinantly using previously reported  
395 heavy and light variable domain sequences deposited in GenBank under accession numbers  
396 DQ168569 and DQ168570(ter Meulen et al., 2006). Antibody variable domain gene sequences  
397 were synthesized by IDT and cloned into human IgG1 and human kappa expression vectors as  
398 previously described (Smith 2009). Antibodies were produced in Expi293F cells according to the

399 manufacturer's recommendations by co-transfecting heavy and light chain plasmids at a ratio of  
400 1:1.5. Antibodies were purified using rProtein A Sepharose Fast Flow antibody purification resin  
401 (GE Healthcare) and buffer exchanged into PBS before use. Biotinylated versions of CR3022  
402 used in viral neutralization assays were produced by combining the antibody with a 20 molar  
403 excess of EZ-Link NHS-PEG4-Biotin (Thermo Fisher Scientific) for 1 hour at room temperatures.  
404 Reactions were stopped by adding Tris pH 8 to a final concentration of 10 mM. The biotinylated  
405 antibody was then buffer exchanged >1000X into PBS using a 10 kDa protein spin-concentrator  
406 (Amicon).

407

#### 408 **Sequence analysis and alignment.**

409 The SARS-CoV-2 spike protein structure(Wrapp et al., 2020) was visualized in Pymol  
410 (Schrödinger, LLC). To assess the homology of coronavirus spike proteins, a global protein  
411 alignment was performed in Geneious (Geneious, Inc.) with translations of genome sequences  
412 accessed through NCBI Nucleotide. Sequences used were GenBank MN908947.3 (SARS-CoV-  
413 2), RefSeq NC\_004718.3 (SARS-CoV), RefSeq NC\_019843.3 (MERS-CoV), NC\_006577.2  
414 (HCoV-HKU1), RefSeq NC\_006213.1 (HCoV-OC43), RefSeq NC\_005831.2 (HCoV-NL63), and  
415 RefSeq NC\_005831.2 (HCoV-229E). Homology at the RBD was determined by sequence identity  
416 between SARS-CoV-2 RBD residues T302 to L560 (Walls et al., 2020; Wang et al., 2020).

417

418 **ELISA assays.** Recombinant SARS-CoV-2 RDB was coated on Nunc MaxiSorp plates at a  
419 concentration of 1 µg/mL in 100 µL phosphate-buffered saline (PBS) at 4°C overnight. Plates  
420 were blocked for two hours at room temperature in PBS/0.05%Tween/1% BSA (ELISA buffer).  
421 Serum or plasma samples were heated to 56°C for 30 min, aliquoted, and stored at -20°C before  
422 use. Samples were serially diluted 1:3 in dilution buffer (PBS-1% BSA-0.05% Tween-20) starting  
423 at a dilution of 1:100. 100 µL of each dilution was added and incubated for 90 minutes at room

424 temperature. 100  $\mu$ L of horseradish peroxidase-conjugated isotype and subclass specific  
425 secondary antibodies, diluted 1 to 2,000 in ELISA buffer, were added and incubated for 60  
426 minutes at room temperature. Development was performed using 0.4 mg/mL o-phenylenediamine  
427 substrate (Sigma) in 0.05 M phosphate-citrate buffer pH 5.0, supplemented with 0.012% hydrogen  
428 peroxide before use. Reactions were stopped with 1 M HCl and absorbance was measured at  
429 490 nm. Between each step, samples were washed four times with 300  $\mu$ L of PBS-0.05% Tween.  
430 Prior to development, plates were additionally washed once with 300  $\mu$ L of PBS. Secondary  
431 antibodies used for development were as follows: anti-hu-IgM-HRP, anti-hu-IgG-HRP, and anti-  
432 hu-IgA-HRP (Jackson Immuno Research, and Mouse anti-hu-IgG1 Fc-HRP, Mouse anti-hu-IgG2  
433 Fc-HRP, Mouse anti-hu-IgG3 Fc-HRP, or Mouse anti-hu-IgG4 Fc-HRP (Southern Biotech).

434

435 **Clinical RBD ELISA assay.** This assay was performed essentially as described above, with the  
436 following modifications to increase throughput: all serum samples were diluted 1:200, and the  
437 incubation times were reduced to 30 minutes after the addition of serum samples and the  
438 secondary antibody conjugate.

439

440 **Focus Reduction Neutralization Assays.** Serially diluted patient plasma and COVID-19 (100-  
441 200 FFU) were combined in DMEM + 1% FBS (Corning Cellgro), and incubated at 37°C for 1  
442 hour. The antibody-virus mixture was aliquoted on a monolayer of VeroE6 cells, gently rocked to  
443 distribute the mixture evenly, and incubated at 37°C for 1 hour. After 1 hour, the antibody-virus  
444 inoculum was removed and prewarmed DMEM supplemented with 1% FBS (Optima, Atlanta  
445 Biologics), HEPES buffer (Corning Cellgro), 2mM L-glutamine (Corning Cellgro), 1mM sodium  
446 pyruvate (Corning Cellgro), 1x Non-essential Amino Acids (Corning Cellgro), 1x antibiotics  
447 (penicillin, streptomycin, amphotericin B; Corning Cellgro) was mixed with methylcellulose  
448 (DMEM [Corning Cellgro], 1% antibiotic, 2% FBS, 2% methylcellulose [Sigma Aldrich]) at a 1:1  
449 ratio and overlaid on the infected VeroE6 cell layer. Plates were incubated at 37°C for 24 hours.

450 After 24 hours, plates were gently washed three times with 1x PBS (Corning Cellgro) and fixed  
451 with 200  $\mu$ l of 2% paraformaldehyde (Electron Microscopy Sciences) for 30 minutes. Following  
452 fixation, plates were washed twice with 1x PBS and 100  $\mu$ l of permeabilization buffer (0.1% BSA-  
453 Saponin in PBS) (Sigma Aldrich), was added to the fixated Vero cell monolayer for 20 minutes.  
454 Cells were incubated with an anti-SARS-CoV spike protein primary antibody conjugated to biotin  
455 (CR3022-biotin) for 1-2 hours at room temperature, then with avidin-HRP conjugated secondary  
456 antibody for 1 hour at room temperature. Foci were visualized using True Blue HRP substrate  
457 and imaged on an ELISPOT reader (CTL). Each plate contained three positive neutralization  
458 control wells, three negative control wells containing healthy control serum mixed with COVID-  
459 19, and three mock-infected wells.

460

## 461 **QUANTIFICATION AND STATISTICAL ANALYSIS**

462 **Statistical analysis.** FRNT<sub>50</sub> curves were generated by non-linear regression analysis using the  
463 4PL sigmoidal dose curve equation on Prism 8 (Graphpad Software). Maximum neutralization  
464 (100%) was considered the number of foci counted in the wells infected with a virus mixed with  
465 COVID-19 naïve healthy patient serum. Neutralization titers were calculated as  $100\% \times [1 -$   
466  $(\text{average number of foci in wells incubated with COVID-19 patient serum}) \div (\text{average number of}$   
467  $\text{foci in wells incubated with control serum})]$ . For the clinical data Receiver Operating Characteristic  
468 (ROC) curves were generated separately for each of three cohorts of clinical validation samples  
469 with progressively increasing PCR-to-serum collection intervals (0-3 days, 4-6 days, 7+ days).  
470 Optical densities (OD) for each sample were entered into Microsoft Excel for Office 365 v16, and  
471 a custom software package was used to iteratively compute the false positive rate (1 - specificity)  
472 and true positive rate (sensitivity) at every OD cutoff level for each cohort. The false-positive rates  
473 (x) and true positive rates (y) were then rendered as scatter plots to generate the ROC curves.

474 Correlations analyses were done by log transforming RBD binding titers or neutralization titers,  
475 followed by linear regression analysis. The  $R^2$  and p-value are reported in each figure.

476

477

478

#### 479 **Supplemental Information**

480 **Supplementary Figure 1. Expression and purification of SARS-CoV-2 RBD.** A) Sequence  
481 homology analysis of the full-length SARS-CoV-2 spike compared to SARS, MERS, and seasonal  
482 alpha- and beta-CoVs. B) SDS-PAGE gel of purified SARS-CoV-2 RBD, cloned and expressed  
483 in Expi293F cells by transient transfection. C) ELISA validation of the RBD protein using a  
484 monoclonal antibody (CR3022) (ter Meulen et al., 2006) directed against the spike protein RBD.  
485 D) Size exclusion chromatography of the recombinant RBD protein. The figure shows the elution  
486 profile (UV absorption 280 nm) of 1 mg RBD protein analyzed in PBS buffer on a Superdex 75  
487 (10/300) size exclusion column.

488

489 **Supplementary Table 1. Emory Medical Laboratories patient cohort (time after PCR-**  
490 **confirmation)**

**Table 1. COVID-19 patient cohort**

| Patient ID# | Age | Sex | Days after symptom onset | Days after + PCR | IgG    | IgM   | IgA   | FRNT50 |
|-------------|-----|-----|--------------------------|------------------|--------|-------|-------|--------|
| 1           | 65  | M   | 8                        | 8                | 1692   | 507   | <100  | 761    |
| 2           | 36  | F   | 15                       | 8                | 86698  | 664   | 313   | 2233   |
| 3           | 41  | M   | 8                        | 2                | 259    | 599   | 116   | 245    |
| 4           | 44  | F   | 9                        | 5                | 2560   | 947   | 442   | 194    |
| 5           | 56  | M   | 17                       | 5                | 10422  | 1574  | 4033  | 3200   |
| 6           | 80  | M   | 29                       | 7                | 22219  | 1242  | 176   | 2483   |
| 7           | 74  | M   | 12                       | 2                | <100   | <100  | <100  | <50    |
| 8           | 66  | M   | 8                        | 3                | 419    | 220   | 85    | 167    |
| 9           | 87  | M   | 9                        | 3                | <100   | <100  | <100  | 124    |
| 10          | 75  | M   | 18                       | 6                | 1174   | 369   | 131   | 539    |
| 11          | 61  | M   | 19                       | 4                | 445    | 282   | <100  | 645    |
| 12          | 80  | M   | 5                        | 5                | 899    | 470   | 316   | 167    |
| 13          | 66  | M   | 10                       | 2                | 4988   | 795   | 297   | 1502   |
| 14          | 37  | F   | 14                       | 3                | 202    | 578   | <100  | 118    |
| 15          | 64  | F   | 8                        | 3                | <100   | 166   | <100  | 55     |
| 16          | 76  | F   | 11                       | 2                | 31205  | 2906  | 230   | 1718   |
| 17          | 70  | F   | 11                       | 2                | 1100   | 246   | <100  | 138    |
| 18          | 63  | F   | 12                       | 5                | <100   | <100  | <100  | <50    |
| 19          | 70  | M   | 5                        | 4                | <100   | 136   | <100  | 156    |
| 20          | 66  | M   | 22                       | 7                | 4269   | 1207  | 324   | 496    |
| 21          | 33  | F   | 7                        | 3                | 243    | 325   | <100  | 174    |
| 22          | 62  | F   | 12                       | 7                | 17917  | 4414  | 706   | 603    |
| 23          | 59  | M   | 11                       | 7                | 21323  | 3865  | 140   | 2799   |
| 24          | 58  | F   | 11                       | 3                | 317    | 364   | 258   | 175    |
| 25          | 76  | M   | 17                       | 7                | 28352  | 1493  | 6865  | 2561   |
| 26          | 49  | M   | 16                       | 3                | 15772  | 491   | 589   | 126    |
| 27          | 54  | M   | 30                       | 10               | 72949  | 13310 | 700   | 3341   |
| 28          | 73  | M   | 11                       | 15               | 69902  | 3412  | 19918 | 911    |
| 29          | 64  | F   | 9                        | 3                | <100   | 119   | 161   | 67     |
| 30          | 37  | F   | 13                       | 3                | 205    | 419   | <100  | 126    |
| 31          | 25  | F   | 3                        | 2                | <100   | <100  | <100  | <50    |
| 32          | 39  | F   | 8                        | 3                | 814    | 362   | 287   | 262    |
| 33          | 60  | M   | 10                       | 6                | 27557  | 50483 | <100  | 5763   |
| 34          | 60  | F   | 15                       | 8                | 43072  | 443   | 214   | 337    |
| 35          | 56  | F   | 18                       | 8                | 71204  | 16298 | 1754  | 1177   |
| 36          | 60  | M   | 17                       | 12               | 142766 | 40197 | <100  | 5378   |
| 37          | 52  | M   | 12                       | 5                | <100   | 317   | <100  | 108    |
| 38          | 73  | M   | 11                       | 4                | 683    | 303   | <100  | <50    |
| 39          | 48  | M   | 8                        | 6                | 9311   | 1750  | 884   | 1068   |
| 40          | 46  | M   | 20                       | 13               | 69361  | 706   | 1112  | 408    |
| 41          | 69  | M   | 18                       | 19               | 33684  | 5517  | 180   | 1882   |
| 42          | 55  | M   | 8                        | 4                | 377    | 1560  | 178   | 79     |
| 43          | 47  | F   | 9                        | 3                | 467    | 1042  | <100  | 158    |
| 44          | 63  | F   | 10                       | 3                | 134    | 186   | <100  | 99     |

Figure 1.

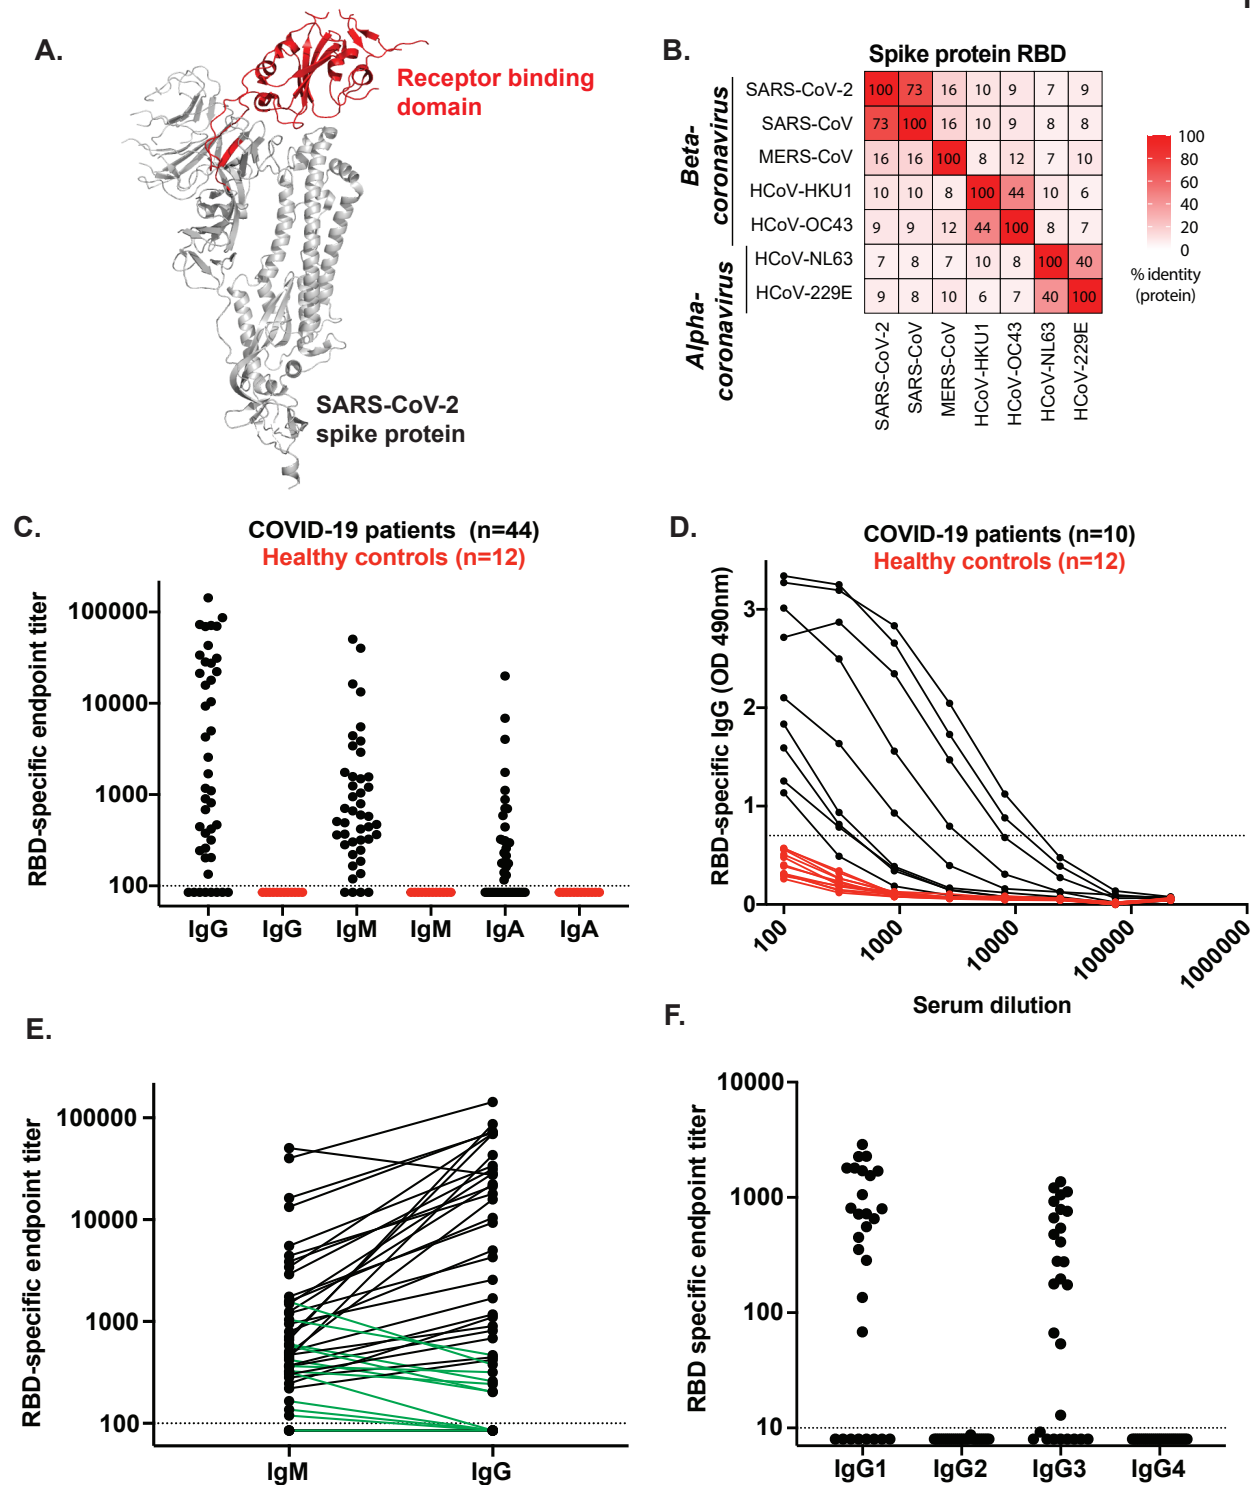



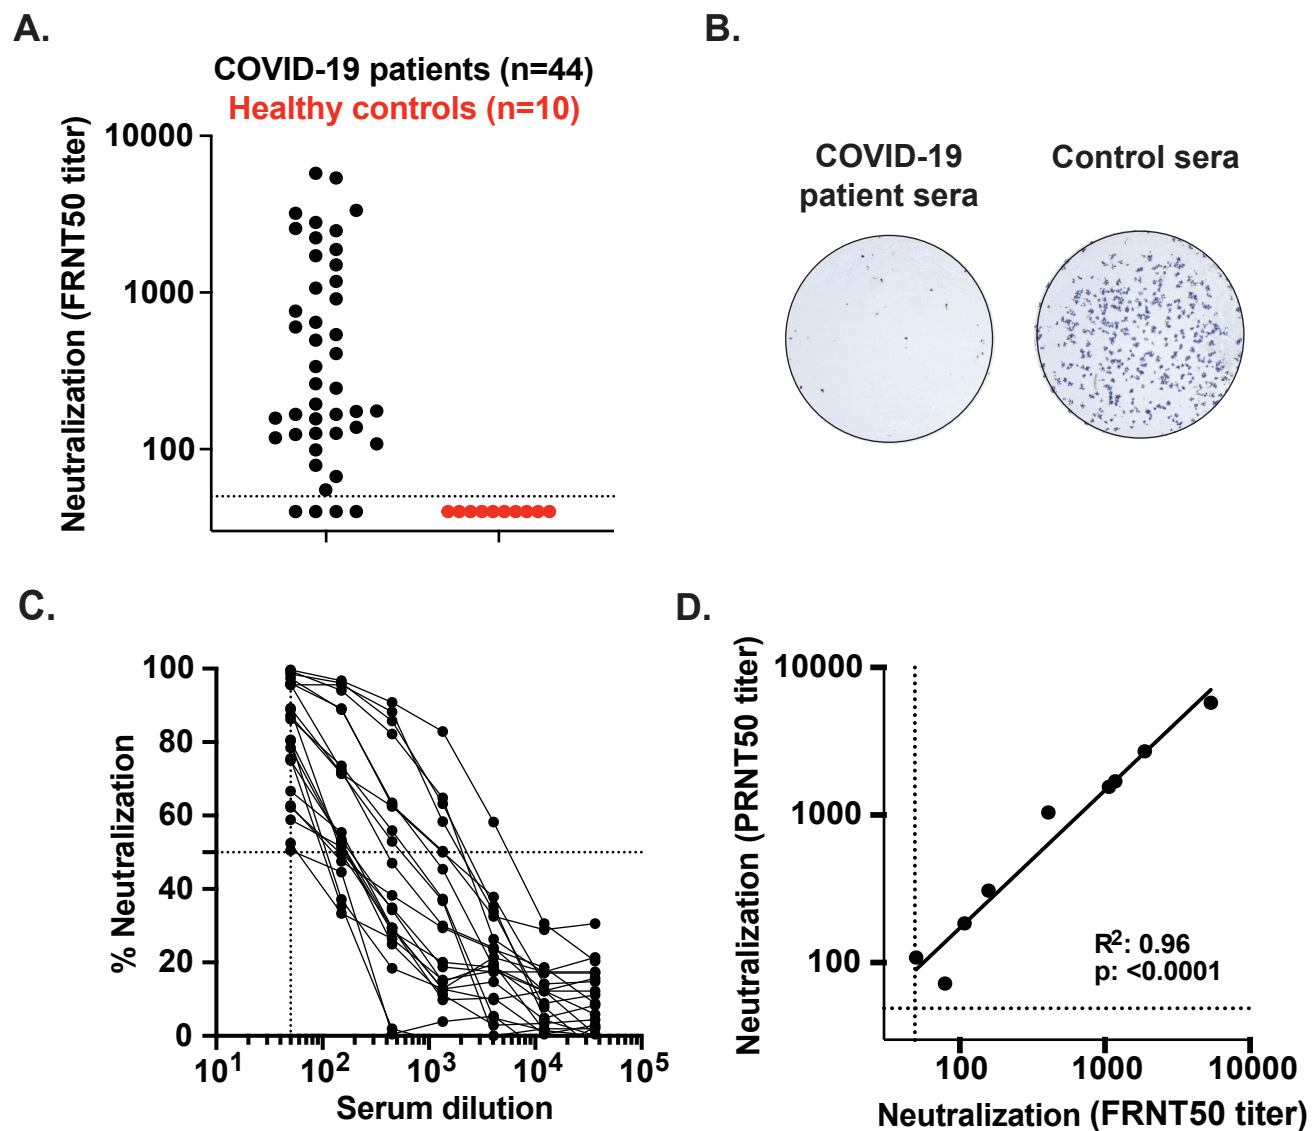

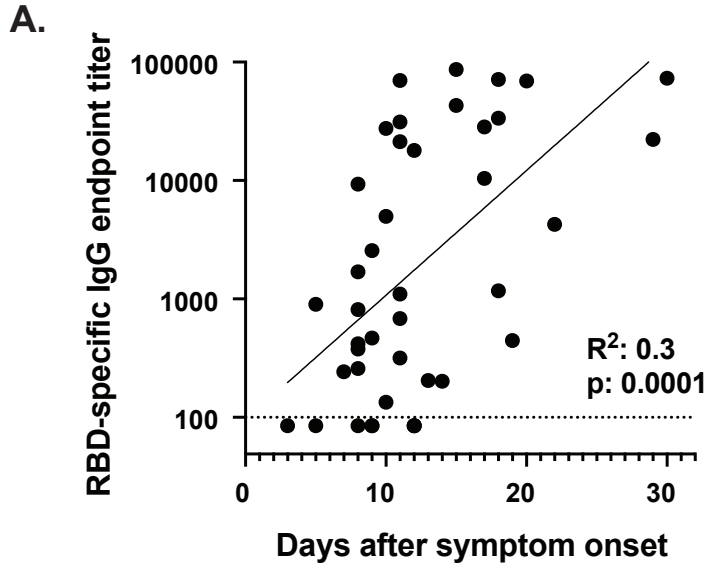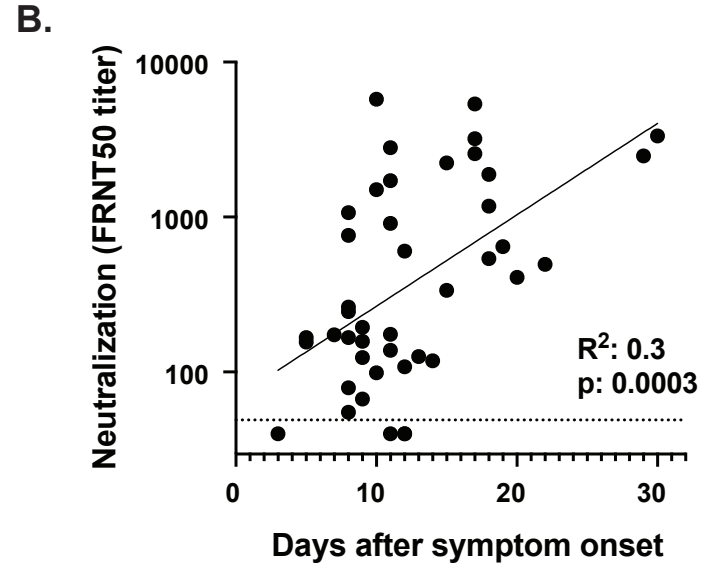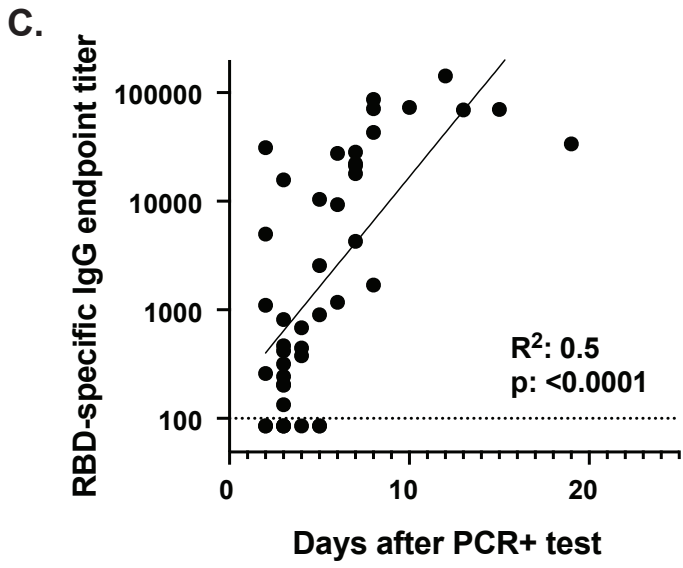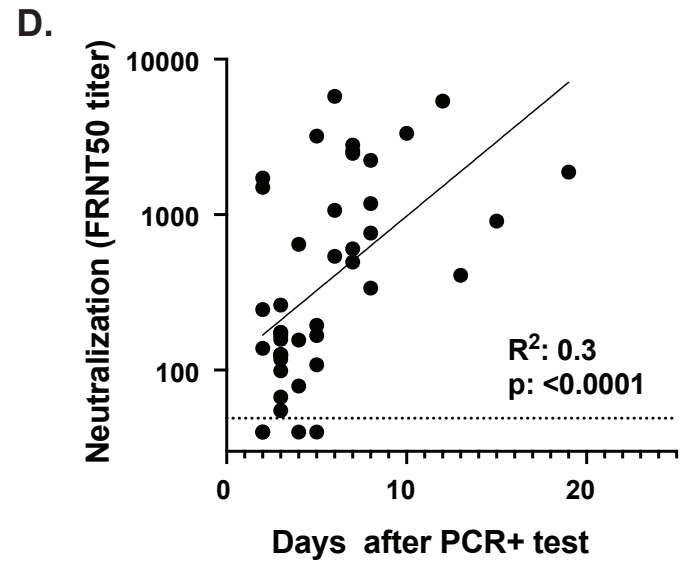

A.

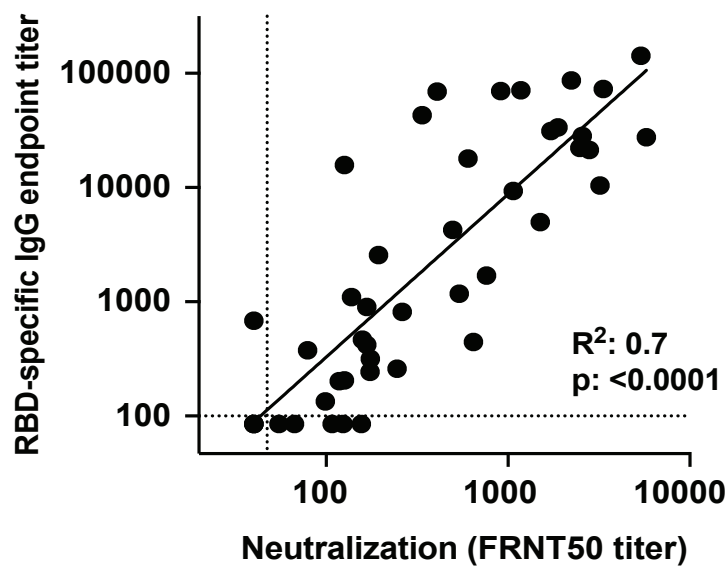

B.

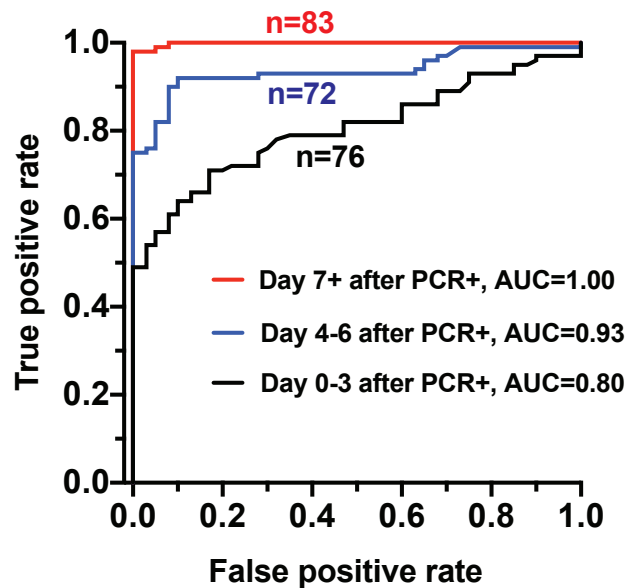

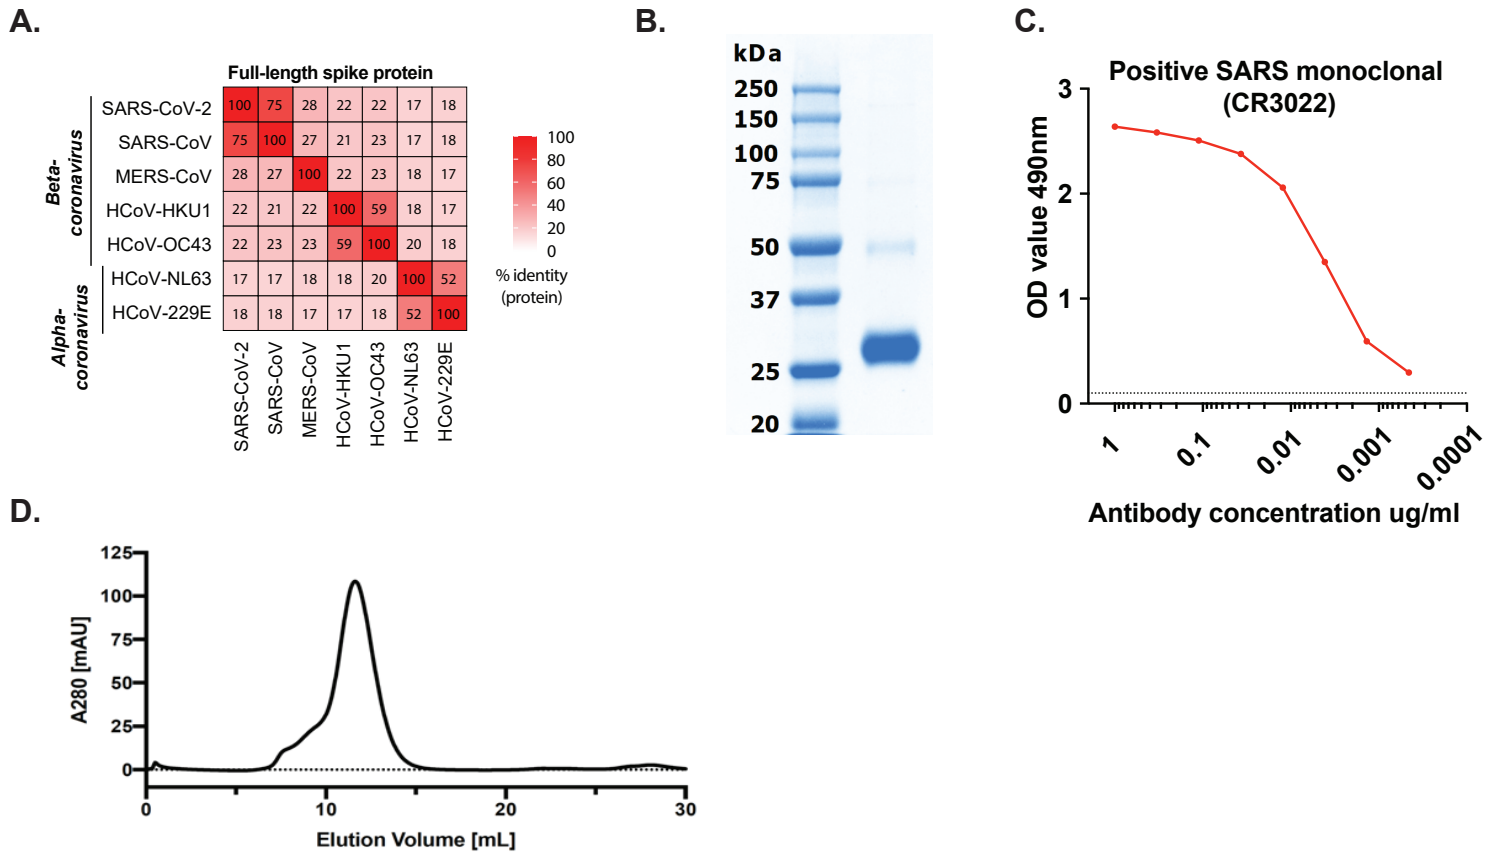

**Supplementary Table 1. Emory Medical Laboratory patient cohort (time after PCR-confirmation)**

| Day post PCR confirmation | Number of cases (n) | Grouping (Days) | Total number |
|---------------------------|---------------------|-----------------|--------------|
| 0                         | 12                  | 0-3             | <b>n=76</b>  |
| 1                         | 14                  | 0-3             |              |
| 2                         | 20                  | 0-3             |              |
| 3                         | 30                  | 0-3             |              |
| 4                         | 21                  | 4-6             | <b>n=72</b>  |
| 5                         | 29                  | 4-6             |              |
| 6                         | 22                  | 4-6             |              |
| 7                         | 15                  | 7+              | <b>n=83</b>  |
| 8                         | 14                  | 7+              |              |
| 9                         | 7                   | 7+              |              |
| 10                        | 4                   | 7+              |              |
| 11                        | 4                   | 7+              |              |
| 12                        | 4                   | 7+              |              |
| 13                        | 3                   | 7+              |              |
| 14                        | 2                   | 7+              |              |
| 15                        | 4                   | 7+              |              |
| 16                        | 4                   | 7+              |              |
| 17                        | 4                   | 7+              |              |
| 18                        | 6                   | 7+              |              |
| 19                        | 3                   | 7+              |              |
| 20                        | 5                   | 7+              |              |
| 21                        | 2                   | 7+              |              |
| 22                        | 2                   | 7+              |              |
